# Supplementary material for: Preparation of high encapsulation efficiency fragrance microcapsules and their application in textiles
Source: Royal Society of Chemistry journal article supplement (doi:10.1039/c6ra16030a), 2016-01-01
Supplement: c6ra16030a1.pdf [file c6ra16030a1.pdf]

# Preparation of High Encapsulation Efficiency Fragrance Microcapsules and Application in Textile

Di Zhao<sup>1</sup>, Xin Jiao<sup>1</sup>, Miaomiao Zhang<sup>1</sup>, Kai Ye<sup>1</sup>, Xiaodi Shi<sup>1</sup>, Xihua Lu<sup>\*,1,2</sup>, Gao  
Qiu<sup>2</sup>, Kenneth J. Shea<sup>3</sup>

<sup>1</sup>College of Chemistry, Chemical Engineering and Biotechnology, Donghua  
University, Shanghai 201620, China

<sup>2</sup>State Key Laboratory for Modification of Chemical Fibers and Polymer Materials,  
College of Materials Science and Engineering, Donghua University, Shanghai  
201620, China

<sup>3</sup>Department of Chemistry, University of California, Irvine, CA 92697, USA

Corresponding author: E-mail Address: luxihua@dhu.edu.cn. Tel: +862167792776.

Fax: +86216779 2776

## Encapsulation efficiency

A certain amount of core materials (DPO/GTCC = 1:1) was dissolved into toluene and a series of standard samples (1.55, 3.10, 4.66, 6.21 and 9.31 mg/ml) were prepared. Firstly, one of the standard samples was scanned via UV visible spectrophotometer (Lambda 35, PerkinElmer) over the range of 200-1100 nm and the maximum absorbance of the core materials was 283 nm shown in **Fig.S1**. And then, the UV absorbances of the five standard samples were tested at 283 nm, respectively. The linear relationship between the concentration of core materials (x) of the five standard samples and their UV absorbance (y) was created according to the calibration curve of spectrophotometry; the equation is  $y=0.00249+0.08915x$  shown in **Fig.S2**. Finally, microcapsule slurry (3 g) of each sample in the **Table 1** was added to toluene (29 ml) with magnetic stirring for 30 seconds, respectively. The unencapsulated core materials (free oil) were extracted from the microcapsule suspension into the toluene. The supernatant solution (toluene solution) was separated

from the microcapsule suspension. Then the supernatant solution was put into a cuvette for testing. And the UV absorbance (y) of the free oil solution was tested by UV visible spectrophotometer. The concentration of free oil solution (x) was calculated through the linear relationship, leading to the whole free oil ( $W_{FO}$ ) of the sample. After that, the encapsulation efficiency (EE) of the core materials was determined by the following equation (1).

$$\text{Encapsulation efficiency (EE)} = 1 - W_{FO}/W \quad (1)$$

$W_{FO}$  is the amount of free oil in the sample suspension and  $W$  is the amount of feeding core materials.

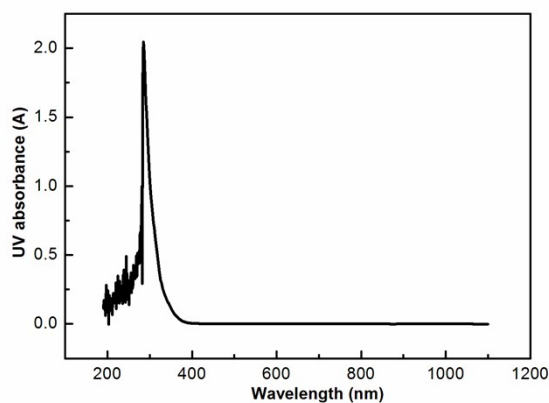

**Fig.S1** The UV-Vis absorbance of core materials

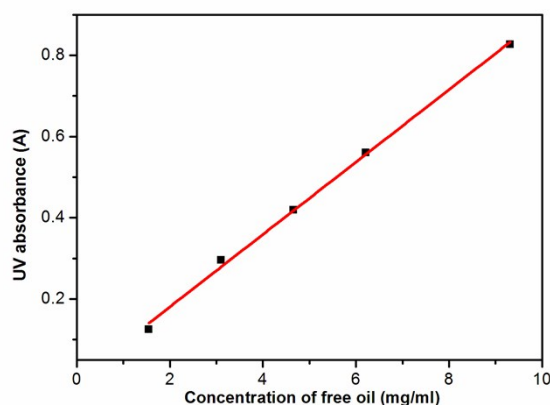

**Fig.S2** The relationship of UV-Vis absorbance with concentration of free oil

### **Washing durability and oil loading capacity**

A certain amount of core materials (DPO/GTCC = 1:1) was dissolved into ethanol and a series of standard samples (0.047, 0.118, 0.237, 0.355 and 0.474 mg/ml) were

prepared. Firstly, one of the standard samples was scanned via UV visible spectrophotometer (Lamda 35, PerkinElmer) over the range of 200-1100 nm and the maximum absorbance of the core materials was 248 nm. And then, the UV absorbances of the five standard samples were tested at 248 nm, respectively. The linear relationship between the concentration of core materials (x) of the five standard samples and their UV absorbance (y) was created according to the calibration curve of spectrophotometry; the equation is  $y=1.74563x-0.00618$  shown in **Fig.S3**. The fabric samples were impregnated in ethanol solution for 24 h. The DPO inside the fragrance microcapsules was extracted through the shell material into the ethanol solution. After that, the fabric samples were separated from the ethanol suspension. The supernatant solution was put into a cuvette to test the concentration of DPO, which contributed to calculate the concentration of DPO in the initial fabric sample. Finally, the mass of DPO in the sample was attained.

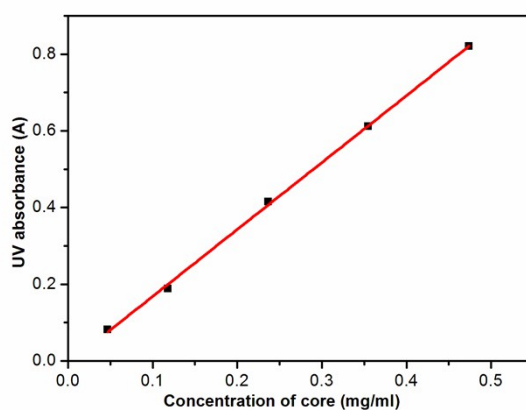

**Fig.S3** The relationship of UV-Vis absorbance with concentration of core materials

#### **Influence of curing temperature on encapsulation efficiency**

The influence of curing temperature on EE was shown in the **Fig.S4**. The corresponding samples were from A<sub>1</sub> to A<sub>4</sub> in the **Table S1**. With the curing temperature increasing from 30 °C rpm to 60 °C rpm, the EE decreased first and then increased as shown in the **Fig.S4**. When the curing temperature was 40 °C, the EE was relatively maximum (85.6 %). In conclusion, the best homogenization rate was

40 °C based on EE.

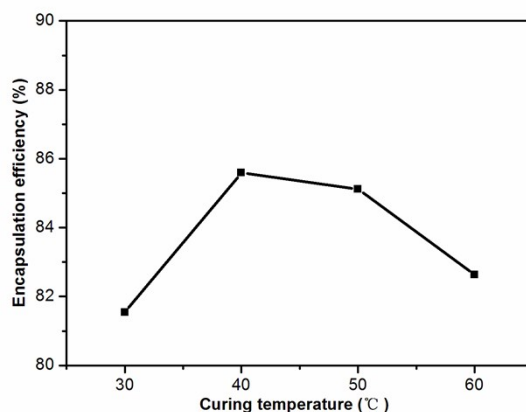

**Fig.S4** Effect of curing temperature on the encapsulation efficiency

#### **Influence of homogenization time on encapsulation efficiency**

When the curing temperature was 40 °C, the EE was variable with the homogenization time increasing, which was shown in **Fig.S5**. The corresponding samples were given from B<sub>1</sub> to B<sub>5</sub> in the **Table S1**. As illuminated in **Fig.S5**, the EE increased first and then decreased with the homogenization time increasing from 2 to 6 minutes. EE was the relatively maximum (86.42 %) when the homogenization time was 4 minutes. In conclusion, 4 minutes was the best homogenization time based on EE.

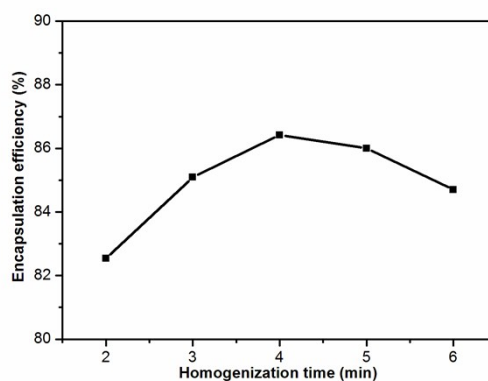

**Fig.S5** Effect of homogenization time on the encapsulation efficiency

### **Influence of the ratio of core/shell on encapsulation efficiency**

The ratio of core/shell had a significant effect on EE, as shown in **Fig.S6**. The specific change of ratio of core/shell was shown from C<sub>1</sub> to C<sub>5</sub> in the **Table S1**. As shown in **Fig.S6**, with the ratio of core/shell increasing, EE rapidly increased first and then decreased slowly. Specifically, as the ratio of core/shell from 2 to 6, EE rapidly increased. When the ratio of core/shell was greater than 6, EE began to decrease. Accordingly, the best ratio of core/shell was 6 based on EE.

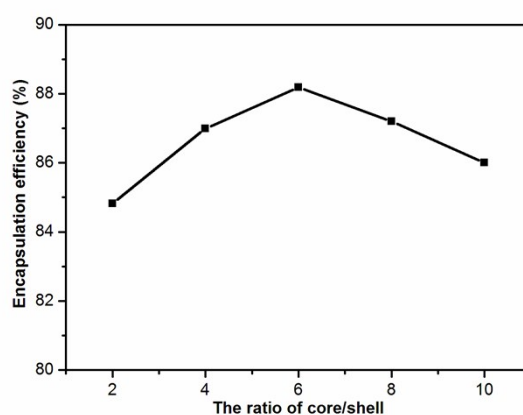

**Fig.S6** Effect of the ratio of core/shell on the encapsulation efficiency

### **Influence of homogenization rate on encapsulation efficiency**

The influence of homogenization rate on EE of the microcapsules was shown in the **Fig.S7**. The corresponding samples were from D<sub>1</sub> to D<sub>5</sub> in the **Table S1**. With the homogenization rate increasing from 5000 rpm to 9000 rpm, the EE decreased first and then increased as shown in the **Fig.S7**. When the homogenization rate was 7000 rpm, EE was the relatively maximum (89.2 %). In conclusion, 7000 rpm was the best homogenization rate based on EE.

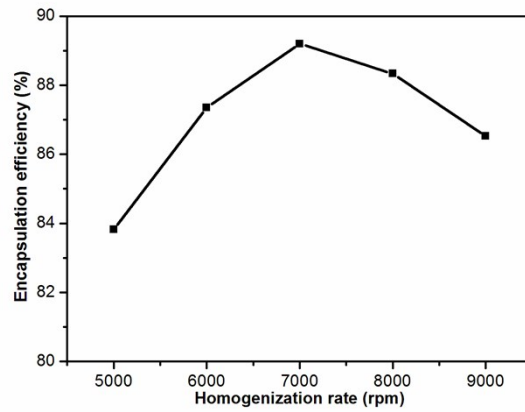

**Fig.S7** Effect of homogenization rate on the encapsulation efficiency

**Table S1** Feed mass of each component for preparation of microcapsules and experimental conditions

|                | Curing temperature (°C) | Homogenization time (min) | Ratio of core/shell | Homogenization rate (rpm) |
|----------------|-------------------------|---------------------------|---------------------|---------------------------|
| A <sub>1</sub> | 30                      |                           |                     |                           |
| A <sub>2</sub> | 40                      |                           |                     |                           |
| A <sub>3</sub> | 50                      | 3                         | 6                   | 6000                      |
| A <sub>4</sub> | 60                      |                           |                     |                           |
| B <sub>1</sub> |                         | 2                         |                     |                           |
| B <sub>2</sub> |                         | 3                         |                     |                           |
| B <sub>3</sub> | 40                      | 4                         | 6                   | 6000                      |
| B <sub>4</sub> |                         | 5                         |                     |                           |
| B <sub>5</sub> |                         | 6                         |                     |                           |
| C <sub>1</sub> |                         |                           | 2                   |                           |
| C <sub>2</sub> |                         |                           | 4                   |                           |
| C <sub>3</sub> | 40                      | 4                         | 6                   | 6000                      |
| C <sub>4</sub> |                         |                           | 8                   |                           |
| C <sub>5</sub> |                         |                           | 10                  |                           |
| D <sub>1</sub> |                         |                           |                     | 5000                      |
| D <sub>2</sub> |                         |                           |                     | 6000                      |
| D <sub>3</sub> | 40                      | 4                         | 6                   | 7000                      |
| D <sub>4</sub> |                         |                           |                     | 8000                      |
| D <sub>5</sub> |                         |                           |                     | 9000                      |

### Influence of homogenization rate on the sizes

The influence of homogenization rate on the sizes of the microcapsules was shown in

the **Fig.S8**. With the homogenization rate increasing from 5000 rpm to 9000 rpm, the size decreased first and then increased. When the homogenization rate was 7000 rpm, the size was the relatively minimum.

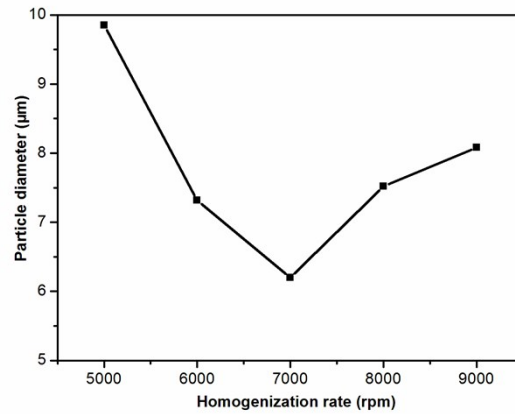

**Fig.S8** Effect of homogenization rate on the sizes
